# Supplementary material
Source: publisher figshare collection journal article supplement (https://tandf.figshare.com/ndownloader/files/17908013)
Supplement: Supplementary file 1 [file 17908013]

Table S1. Oil content and fatty acid composition (%) of *Camelina sativa* seeds

|  | Experimental | Control |
| --- | --- | --- |
| Oil content (%) | 30.8 | 30.0 |
| 16:0 | 7.7 | 6.7 |
| 18:0 | 3.2 | 3.0 |
| 18:1n-9 | 11.7 | 11.7 |
| 18:2n-6 | 20.3 | 19.3 |
| 18:3n-3 | 31.2 | 33.7 |
| 20:1n-9 | 13.4 | 14.0 |
| 22:1n-9 | 4.0 | 4.0 |

Palmitic acid (16:0), stearic acid (18:0), oleic acid (18:1n-9), linoleic acid (18:2n-6), α-linolenic acid (18:3n-3), gondoic acid (20:1n-9), and erucic acid (22:1n-9).
